# Supplementary material for: Cardiac Magnetic Resonance Stress Perfusion Imaging for Evaluation of Patients With Chest Pain
Source: PubMed Central journal article supplement — J Am Coll Cardiol. Author manuscript; Available in PMC 2021 May 10. (PMC8109181; doi:10.1016/j.jacc.2019.07.074), 2019-10-08

| <b>Online Table 1. Procedural Costs Based on Medicare Payment Rates</b> |                                                                                                                                                                                                                                                                                           |                                                |             |             |             |             |             |             |             |             |             |
|-------------------------------------------------------------------------|-------------------------------------------------------------------------------------------------------------------------------------------------------------------------------------------------------------------------------------------------------------------------------------------|------------------------------------------------|-------------|-------------|-------------|-------------|-------------|-------------|-------------|-------------|-------------|
|                                                                         |                                                                                                                                                                                                                                                                                           | <b>Medicare National Payment Rates by Year</b> |             |             |             |             |             |             |             |             |             |
| <b>Year</b>                                                             | <b>Description</b>                                                                                                                                                                                                                                                                        | <b>2008</b>                                    | <b>2009</b> | <b>2010</b> | <b>2011</b> | <b>2012</b> | <b>2013</b> | <b>2014</b> | <b>2015</b> | <b>2016</b> | <b>2017</b> |
| <b>Nuclear SPECT (HCPCS code 78451, 78452)</b>                          | Myocardial perfusion imaging, tomographic (SPECT) (including attenuation correction, qualitative or quantitative wall motion, ejection fraction by first pass or gated technique, additional quantification, when performed); single study, at rest or stress (exercise or pharmacologic) | \$760                                          | \$760       | \$760       | \$760       | \$673       | \$680       | \$1,154     | \$1,141     | \$1,108     | \$1,139     |
| <b>CT Angiography (HCPCS code 75572, 75574)</b>                         | Computed tomography, heart, with contrast material, for evaluation of cardiac structure and morphology (including 3D image post-processing, assessment of cardiac function, and evaluation of venous structures, if performed)                                                            | \$257                                          | \$257       | \$257       | \$257       | \$262       | \$267       | \$222       | \$216       | \$237       | \$265       |

|                                                          |                                                                                                                                                                                                                  |       |       |       |       |       |       |         |         |         |       |
|----------------------------------------------------------|------------------------------------------------------------------------------------------------------------------------------------------------------------------------------------------------------------------|-------|-------|-------|-------|-------|-------|---------|---------|---------|-------|
| <b>Stress Echocardiography (HCPCS code 93350, 93351)</b> | Echocardiography rest and CV during stress test with interpretation and report; increased electrocardiographic monitoring, with physician supervision                                                            | \$562 | \$562 | \$562 | \$562 | \$579 | \$559 | \$594   | \$594   | \$417   | \$450 |
| <b>Exercise Stress Test (HCPCS code 93017)</b>           | Cardiovascular stress test using maximal or submaximal treadmill or bicycle exercise, continuous electrocardiographic monitoring, and/or pharmacological stress; tracing only, without interpretation and report | \$178 | \$178 | \$178 | \$178 | \$178 | \$177 | \$244   | \$238   | \$220   | \$232 |
| <b>Stress CMR (HCPCS code 75563)</b>                     | Cardiac magnetic resonance imaging for morphology and function without contrast material(s), followed by contrast material(s) and further sequences; with stress imaging                                         | \$534 | \$534 | \$534 | \$534 | \$534 | \$549 | \$1,154 | \$1,141 | \$1,108 | \$657 |

|                                                  |                                                                  |         |         |         |         |         |         |         |         |         |         |
|--------------------------------------------------|------------------------------------------------------------------|---------|---------|---------|---------|---------|---------|---------|---------|---------|---------|
| <b>Diagnostic Angiography (HCPCS code 93458)</b> | X-ray coronary angiography with left heart catheterization (XCA) | \$1,055 | \$1,055 | \$1,055 | \$1,055 | \$1,098 | \$1,112 | \$1,084 | \$1,094 | \$1,092 | \$1,025 |
|--------------------------------------------------|------------------------------------------------------------------|---------|---------|---------|---------|---------|---------|---------|---------|---------|---------|

| <b>Online Table 2. Characteristics of Participating Centers in the SPINS Registry</b> |                  |                                     |                                            |                              |                               |                              |                                |                                |                                                          |                                                            |                                          |                                      |                                |                     |
|---------------------------------------------------------------------------------------|------------------|-------------------------------------|--------------------------------------------|------------------------------|-------------------------------|------------------------------|--------------------------------|--------------------------------|----------------------------------------------------------|------------------------------------------------------------|------------------------------------------|--------------------------------------|--------------------------------|---------------------|
|                                                                                       | <b>All Sites</b> | <b>Brigham and Women's Hospital</b> | <b>San Antonio Military Medical Center</b> | <b>University of Chicago</b> | <b>University of Kentucky</b> | <b>Ohio State University</b> | <b>Revere Health</b>           | <b>University of Minnesota</b> | <b>New York Presbyterian-Brooklyn Methodist Hospital</b> | <b>Houston Methodist DeBakey Heart and Vascular Center</b> | <b>University of Illinois at Chicago</b> | <b>Sharon Regional Health System</b> | <b>Scripps Clinic</b>          | <b>NHLBI/NIH</b>    |
| City, State                                                                           |                  | Boston, Massachusetts               | San Antonio, Texas                         | Chicago, Illinois            | Lexington, Kentucky           | Columbus, Ohio               | Provo, Utah                    | Minneapolis, Minnesota         | Brooklyn, New York                                       | Houston, Texas                                             | Chicago, Illinois                        | Sharon, Pennsylvania                 | San Diego, California          | Bethesda, Maryland  |
| Total Enrolled (N, %)                                                                 | 2,349            | 362                                 | 114                                        | 121                          | 100                           | 122                          | 497                            | 113                            | 179                                                      | 100                                                        | 101                                      | 285                                  | 113                            | 142                 |
| Practice Setting                                                                      |                  | University Hospital                 | Military Hospital                          | University Hospital          | University Hospital           | University Hospital          | Multi-specialty Group Practice | University Hospital            | Cardiovascular Group Practice                            | University Hospital                                        | University Hospital                      | Cardiovascular Group Practice        | Multi-specialty Group Practice | Government Hospital |

|                                         |            |          |          |         |         |          |          |         |          |         |          |          |         |           |
|-----------------------------------------|------------|----------|----------|---------|---------|----------|----------|---------|----------|---------|----------|----------|---------|-----------|
| Mean Age (mean, SD)                     | 63 ± 11    | 62 ± 11  | 62 ± 12  | 58 ± 11 | 57 ± 10 | 57 ± 11  | 66 ± 10  | 63 ± 12 | 65 ± 11  | 61 ± 10 | 63 ± 12  | 63 ± 12  | 65 ± 11 | 59 ± 10   |
| Female (N, %)                           | 1,104 (47) | 130 (36) | 51 (45)  | 58 (48) | 49 (49) | 76 (62)  | 218 (44) | 52 (46) | 92 (51)  | 43 (43) | 56 (55)  | 167 (59) | 42 (37) | 70 (49)   |
| History of MI (N, %)                    | 358 (15)   | 67 (19)  | 19 (17)  | 13 (11) | 32 (32) | 25 (20)  | 87 (18)  | 18 (16) | 17 (10)  | 23 (23) | 14 (14)  | 9 (3)    | 17 (15) | 17 (12)   |
| History of PCI (N, %)                   | 538 (23)   | 75 (21)  | 30 (26)  | 14 (12) | 36 (36) | 39 (32)  | 148 (30) | 28 (25) | 30 (17)  | 25 (25) | 18 (18)  | 46 (16)  | 23 (20) | 26 (18)   |
| Coronary Risk Factors, median (IQR)     | 3 (2)      | 3 (2)    | 4 (1)    | 3 (1)   | 4 (2)   | 4 (1)    | 3 (2)    | 3 (2)   | 3 (2)    | 4 (2)   | 3 (2)    | 3 (2)    | 3 (2)   | 3 (2)     |
| History of HTN (N, %)                   | 1842 (78)  | 276 (76) | 102 (89) | 87 (72) | 87 (87) | 104 (85) | 370 (74) | 91 (81) | 146 (82) | 83 (83) | 83 (82)  | 225 (79) | 70 (62) | 118 (83)  |
| History of hypercholesterolemia (N, %)  | 1647 (70)  | 244 (67) | 97 (85)  | 84 (69) | 81 (81) | 100 (82) | 318 (64) | 81 (72) | 117 (65) | 72 (73) | 71 (70)  | 189 (67) | 85 (75) | 108 (76)  |
| History of Diabetes mellitus (N, %)     | 664 (28)   | 93 (26)  | 40 (35)  | 37 (31) | 36 (36) | 37 (30)  | 122 (25) | 36 (32) | 72 (40)  | 36 (36) | 32 (32)  | 66 (23)  | 14 (12) | 43 (30)   |
| History of smoking (N, %)               | 756 (32)   | 89 (25)  | 38 (33)  | 53 (45) | 49 (49) | 67 (55)  | 54 (11)  | 62 (55) | 33 (18)  | 42 (43) | 44 (44)  | 123 (43) | 46 (41) | 56 (40)   |
| Family history of premature CAD (N, %)  | 761 (34)   | 91 (27)  | 32 (28)  | 77 (64) | 35 (38) | 72 (64)  | 109 (22) | 35 (31) | 29 (16)  | 70 (71) | 12 (12)  | 112 (43) | 36 (40) | 51 (37.5) |
| Symptoms leading to CMR (CP or dyspnea) | 1825 (78)  | 247 (68) | 102 (89) | 76 (63) | 99 (99) | 110 (90) | 371 (75) | 76 (67) | 113 (63) | 69 (69) | 100 (99) | 250 (88) | 76 (67) | 136 (96)  |

|                                                          |                                                         |                               |                            |                              |                         |                               |                       |                               |                                        |                           |                            |                              |                         |                        |
|----------------------------------------------------------|---------------------------------------------------------|-------------------------------|----------------------------|------------------------------|-------------------------|-------------------------------|-----------------------|-------------------------------|----------------------------------------|---------------------------|----------------------------|------------------------------|-------------------------|------------------------|
| LVEF (%), median (IQR)                                   | 63 (16)                                                 | 60 (24)                       | 67 (17)                    | 60 (12)                      | 63 (13)                 | 64 (11)                       | 68 (12)               | 61 (12)                       | 58 (18)                                | 63 (28)                   | 70 (17)                    | 61 (12)                      | 58 (11)                 | 62 (11)                |
| 1.5-T or 3-T                                             | 1.5-T 65%, 3-T 35%                                      | 1.5-T 6%, 3-T 94%             | 1.5-T 96%, 3-T 4%          | 1.5-T 100%                   | 1.5-T 93%, 3-T 7%       | 1.5-T 100%                    | 1.5-T 39%, 3-T 61%    | 1.5-T 100%                    | 1.5-T 100%                             | 1.5-T 43%, 3-T 57%        | 3-T 100%                   | 1.5-T 100%                   | 1.5-T 100%              | 1.5-T 100%             |
| MRI Vendor                                               | Siemens 69%, GE 22%, Philips 9%                         | Siemens 96%, GE 4%            | Siemens 100%               | Philips 99%, GE 1%           | Siemens 100%            | Siemens 100%                  | GE 100%               | Siemens 100%                  | Siemens 100%                           | Siemens 100%              | Philips 100%               | Siemens 100%                 | Siemens 100%            | Siemens 100%           |
| Typical Stress Perfusion Method (type, segmental model)* | FLASH 58%, EPI 36%, SSFP 6%                             | FLASH, 17-segment, 100%       | FLASH, 16-segment, 100%    | EPI, 17-segment, 100%        | FLASH, 17-segment, 100% | EPI, 17-segment, 100%         | EPI, 16-segment, 100% | FLASH, 16-segment, 100%       | FLASH, 16-segment, 100%                | EPI, 17-segment, 100%     | FLASH, 17-segment, 100%    | FLASH, 16-segment, 100%      | FLASH, 17-segment, 100% | SSFP, 16-segment, 100% |
| Typical LGE Method (type, segmental model)**             | IR-GRE 100%                                             | IR-GRE, 17-segment            | IR-GRE, 17-segment         | IR-GRE, 17-segment           | IR-GRE, 17-segment      | IR-GRE, 17-segment            | IR-GRE, 17-segment    | IR-GRE, 17-segment            | IR-GRE, 17-segment                     | IR-GRE, 17-segment        | IR-GRE, 17-segment         | IR-GRE, 17-segment           | IR-GRE, 17-segment      | IR-GRE, 17-segment     |
| Contrast Used (type)                                     | Magnevist 62%, Omniscan 17%, Multihance 10%, Optima 6%, | Magnevist 77%, Multihance 23% | Magnevist 99%, Omniscan 1% | Omniscan 89%, Multihance 11% | Magnevist 100%          | Magnevist 64%, Multihance 36% | Magnevist 100%        | Magnevist 58%, Multihance 42% | Optima 67%, Omniscan 31%, Magnevist 2% | Magnevist 69%, Optima 31% | Prohance 89%, Omniscan 11% | Omniscan 79%, Multihance 21% | Magnevist 97%, Gado 3%  | Magnevist 100%         |

|                                                                                                     |                                                 |                                |                                |                               |                                   |                                |                                |                  |                                  |                  |                  |                                |                               |                                  |
|-----------------------------------------------------------------------------------------------------|-------------------------------------------------|--------------------------------|--------------------------------|-------------------------------|-----------------------------------|--------------------------------|--------------------------------|------------------|----------------------------------|------------------|------------------|--------------------------------|-------------------------------|----------------------------------|
|                                                                                                     | Others<br>5%                                    |                                |                                |                               |                                   |                                |                                |                  |                                  |                  |                  |                                |                               |                                  |
| Pharmacologic Stress Used                                                                           | Regadenoson 72%, Adenosine 27%, Dipyridamole 1% | Regadenoson 84%, Adenosine 16% | Regadenoson 54%, Adenosine 46% | Regadenoson 96%, Adenosine 4% | Regadenoson 88%, Dipyridamole 12% | Regadenoson 48%, Adenosine 52% | Regadenoson 20%, Adenosine 80% | Regadenoson 100% | Regadenoson 98%, Dipyridamole 2% | Regadenoson 100% | Regadenoson 100% | Regadenoson 81%, Adenosine 19% | Regadenoson 98%, Adenosine 2% | Regadenoson 97%, Dipyridamole 3% |
| Average Study Follow-up in years (IQR)                                                              | 5.4 (2.2)                                       | 5.4 (2.8)                      | 5.7 (2.3)                      | 6.1 (1.7)                     | 5.0 (1.2)                         | 6.2 (2.4)                      | 6.7 (2.3)                      | 4.9 (0.7)        | 5.8 (1.7)                        | 4.8 (1.6)        | 5.0 (0.4)        | 4.6 (0.7)                      | 5.1 (0.9)                     | 6.5 (2.2)                        |
| *FLASH = Fast low angle single-shot, EPI = Echo-planar imaging, SSFP = steady-state free precession |                                                 |                                |                                |                               |                                   |                                |                                |                  |                                  |                  |                  |                                |                               |                                  |
| **IR-GRE = Inversion recovery prepared gradient-echo                                                |                                                 |                                |                                |                               |                                   |                                |                                |                  |                                  |                  |                  |                                |                               |                                  |

## **Online Figure legend**

**Online Figure 1: Secondary outcome over years of follow-up.** Occurrence of secondary outcome across different years of study follow-up, stratified by presence/absence of ischemia and LGE.

**Online Figure 2: Costs of ischemia testing in the first year after CMR.** Costs of downstream cardiac tests incurred during first year of follow-up, stratified by stress CMR findings and practice type. Costs are in dollars spent per patient.

#For patients with Ischemia+/LGE+, costs spending was higher in Government/Military hospitals than the other 3 practice types ( $p < 0.01$ ). \*For patients with Ischemia+/LGE-, costs spending at Government/Military and Multi-specialty group were higher than university hospitals ( $p < 0.05$ ).

**Online Figure 1**

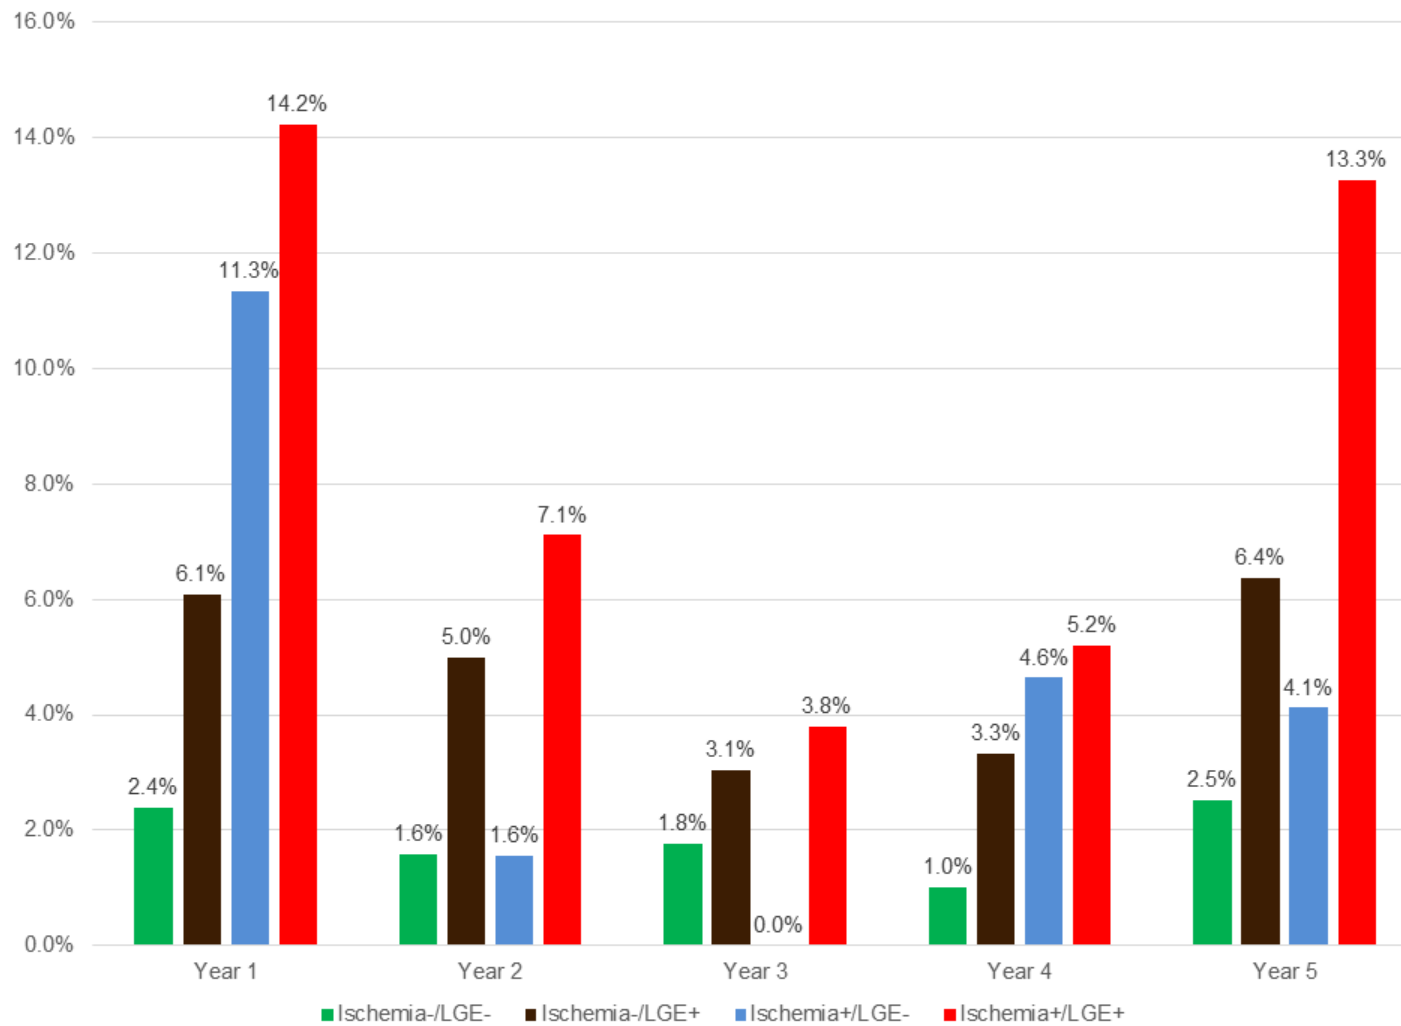



Online Figure 2

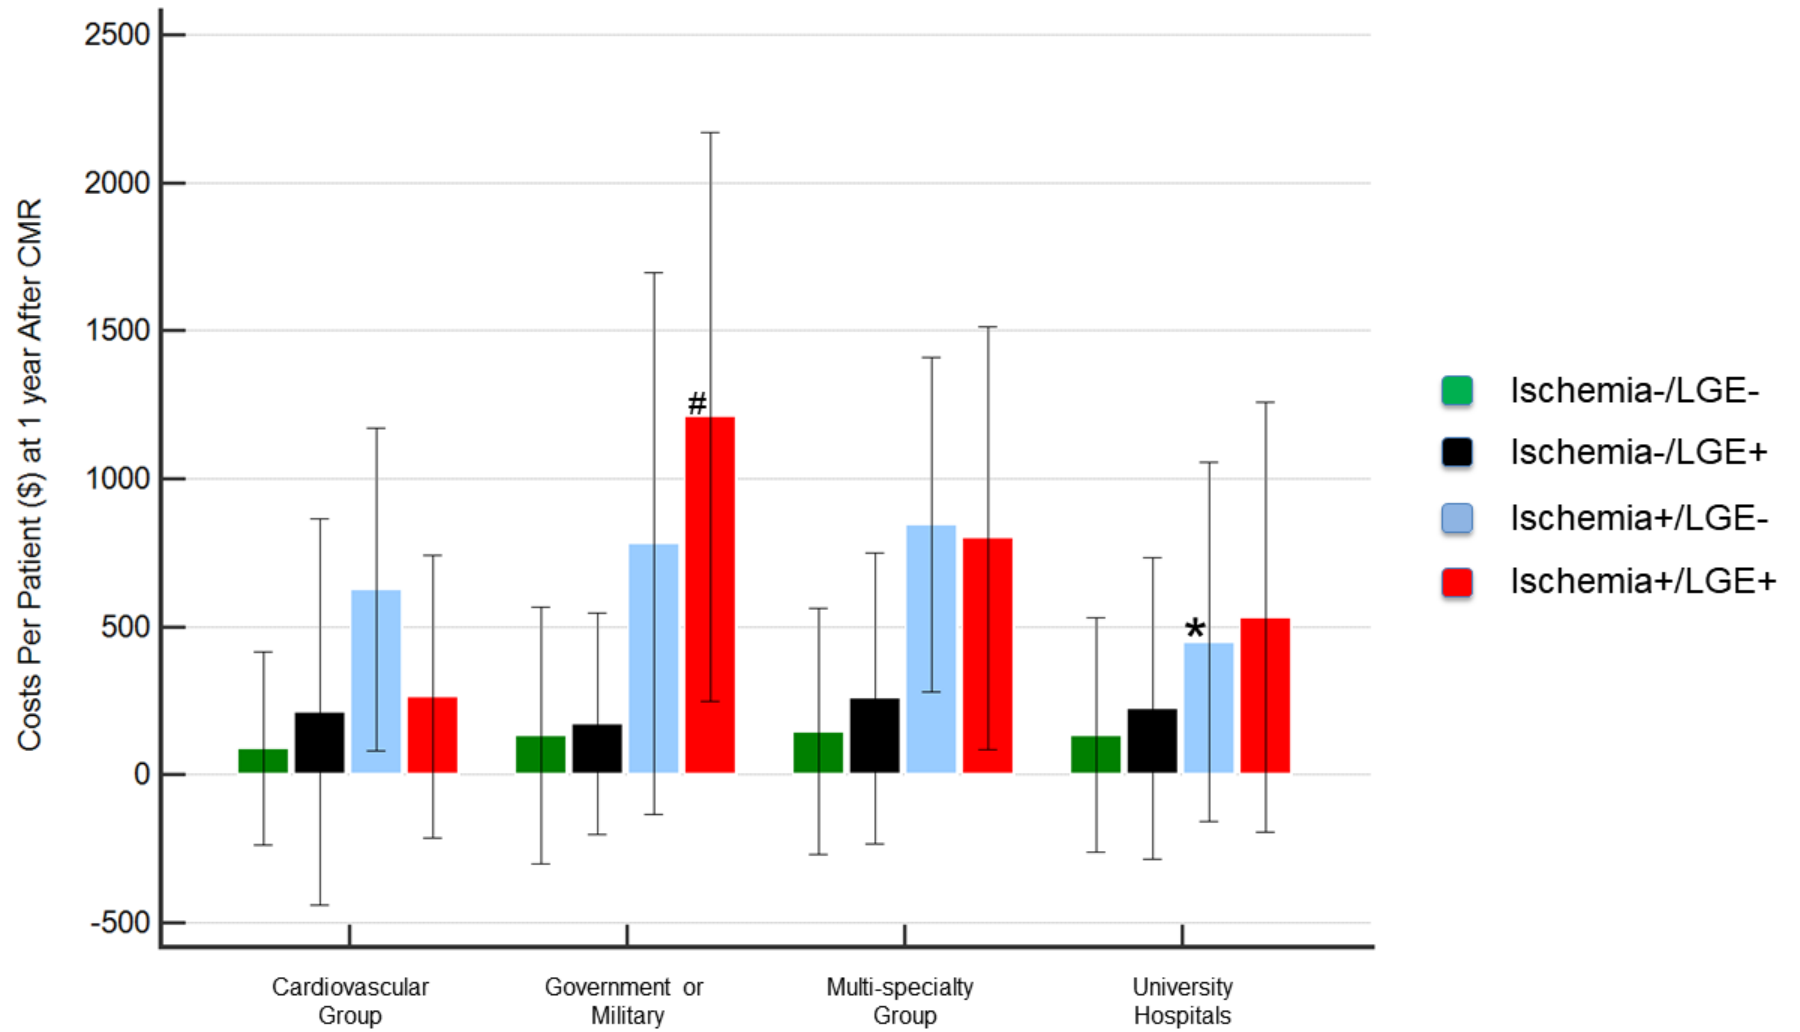

Supplement: NIHMS1695936-supplement-Supplemental_tables_and_figures.pdf [file NIHMS1695936-supplement-Supplemental_tables_and_figures.pdf]
